# Supplementary material for: Pyrimidine-based functional fluorescent organic nanoparticle probe for detection of Pseudomonas aeruginosa
Source: Royal Society of Chemistry journal article supplement (doi:10.1039/c5ob00206k), 2015-01-01
Supplement: c5ob00206k1.pdf [file c5ob00206k1.pdf]

## Supplementary information

### **Pyrimidine based Functional Fluorescent Organic Nanoparticles Probe for Detection of *Pseudomonas Aeruginosa***

**Gaganpreet Kaur<sup>a†</sup>, Tilak Raj<sup>b†</sup>, Navneet Kaur<sup>a\*</sup>, and Narinder Singh<sup>b\*</sup>**

<sup>a</sup>Centre for Nanoscience & Nanotechnology (UIEAST), Panjab University Chandigarh 160014, India. E-mail: navneetkaur@pu.ac.in, Tel: +911722534464

<sup>b</sup>Department of Chemistry, Indian Institute of Technology Ropar, Rupnagar, Punjab 140001, India. E-mail: nsingh@iitrpr.ac.in, Tel: +911881242176, Fax: +911881223395

\*Corresponding authors.

† Both authors have contributed equally.

#### Table of contents

**Figure S1.** Fluorescence spectra of **FONPs** at different pH values

**Figure S2.** Fluorescence spectra of **FONPs** on addition of *Pseudomonas Aeruginosa* at different pH values

**Figure S3.** Fluorescence spectra of **FONPs** at different concentrations of tetrabutylammonium perchlorate to evaluate the salt effect.

**Figure S4.** Effect of varying DMSO- water content on the recognition properties of **FONPs**

**Figure S5.** Effect of using buffer on the recognition properties of **FONPs**.

**Figure S6.** Fluorescence spectra of **FONPs** on addition of various metal ions

**Figure S7.** <sup>1</sup>H NMR of compound **1**

**Figure S8.** <sup>13</sup>C NMR of compound **1**.

**Figure S9.** Mass spectra of compound **1**

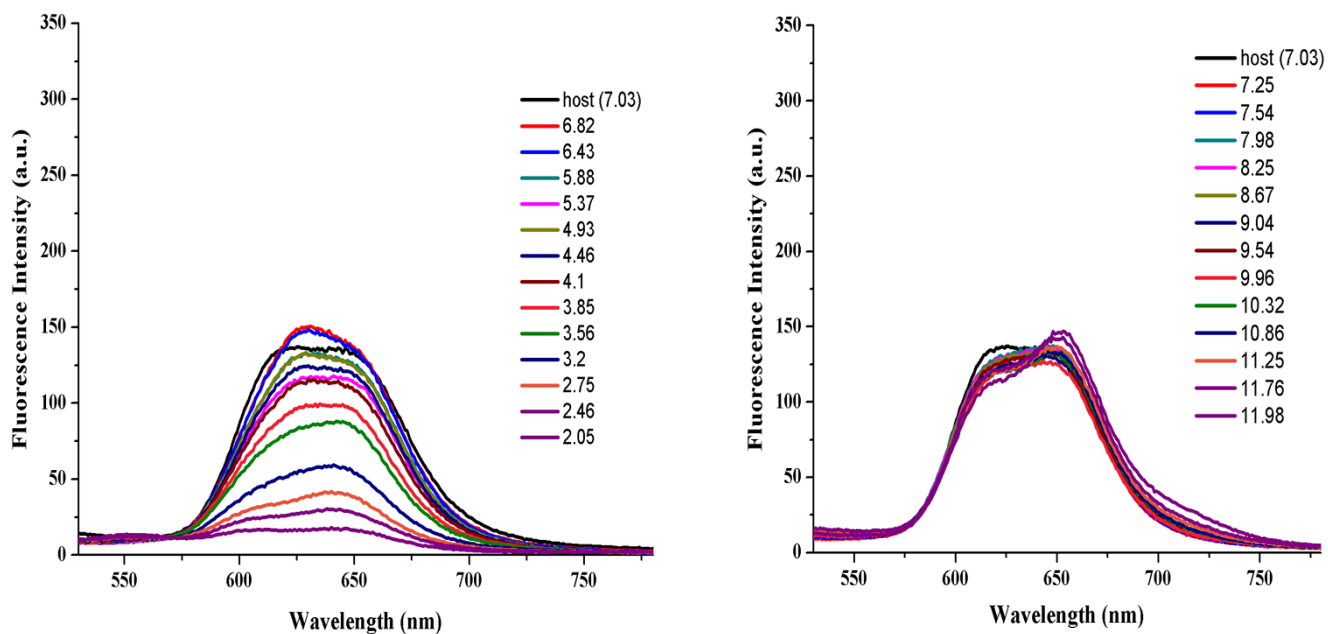

**Figure S1.** Fluorescence spectra of **FONPs** at different pH values.

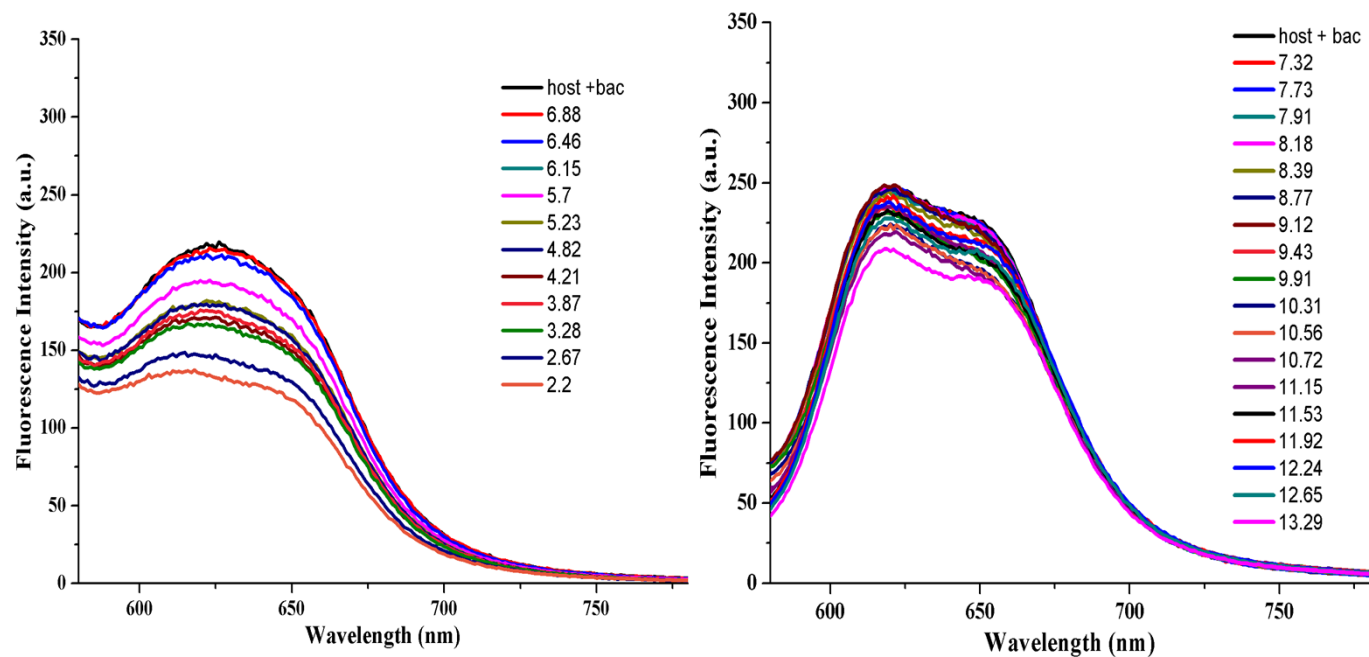

**Figure S2.** Fluorescence spectra of **FONPs** on addition of *Pseudomonas Aeruginosa* at different pH values.

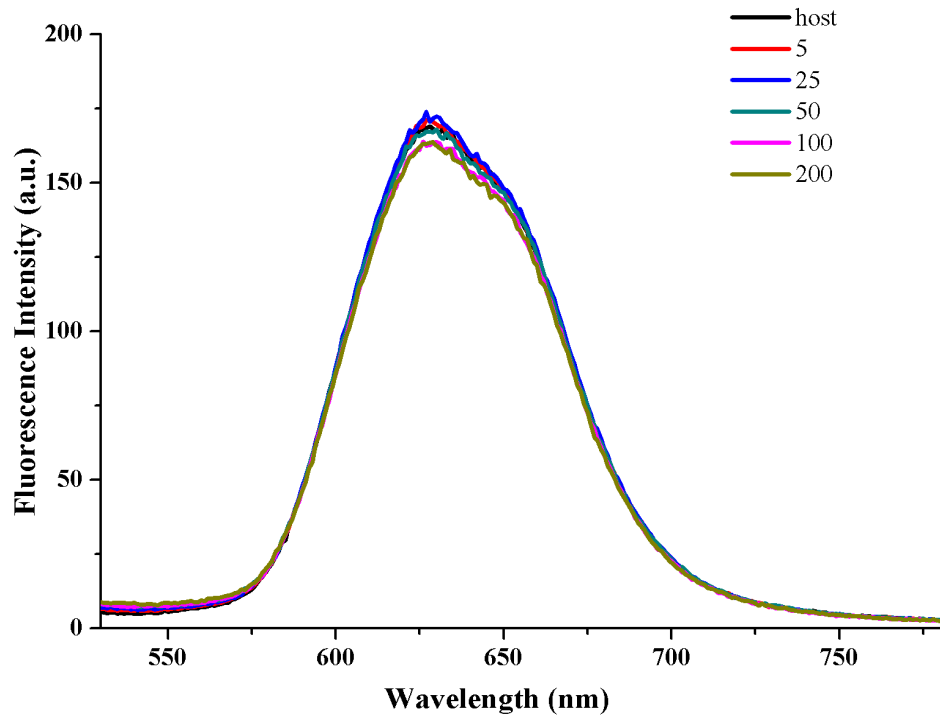

**Figure S3.** Fluorescence spectra of **FONPs** at different concentrations of tetrabutylammonium perchlorate to evaluate the salt effect.

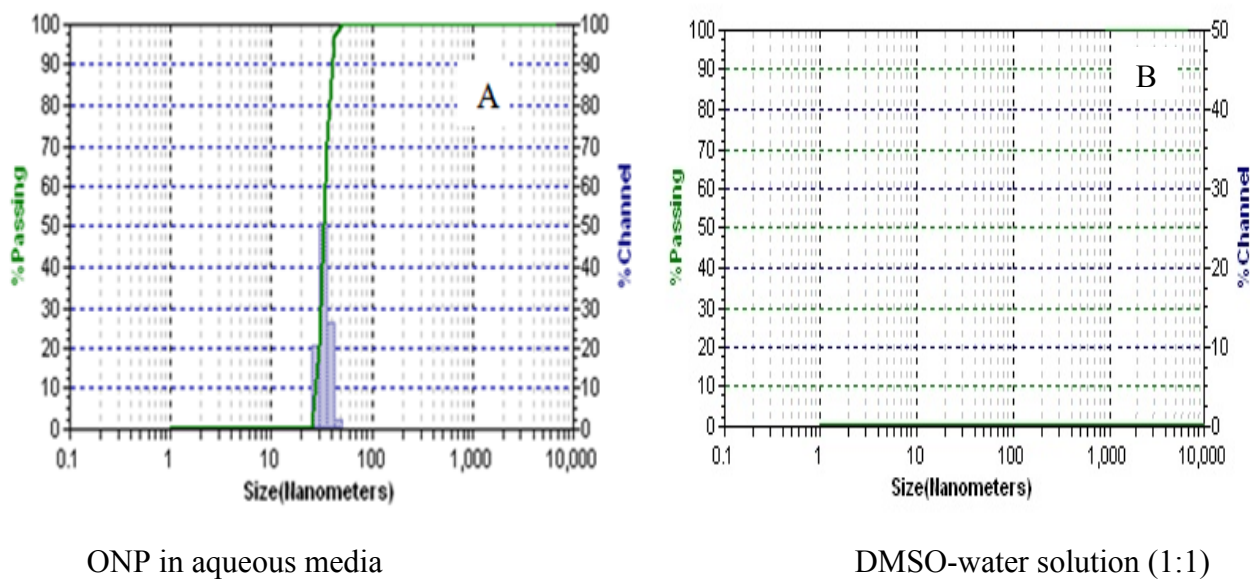

**Figure S4.** Effect of varying DMSO- water content on the **FONPs**

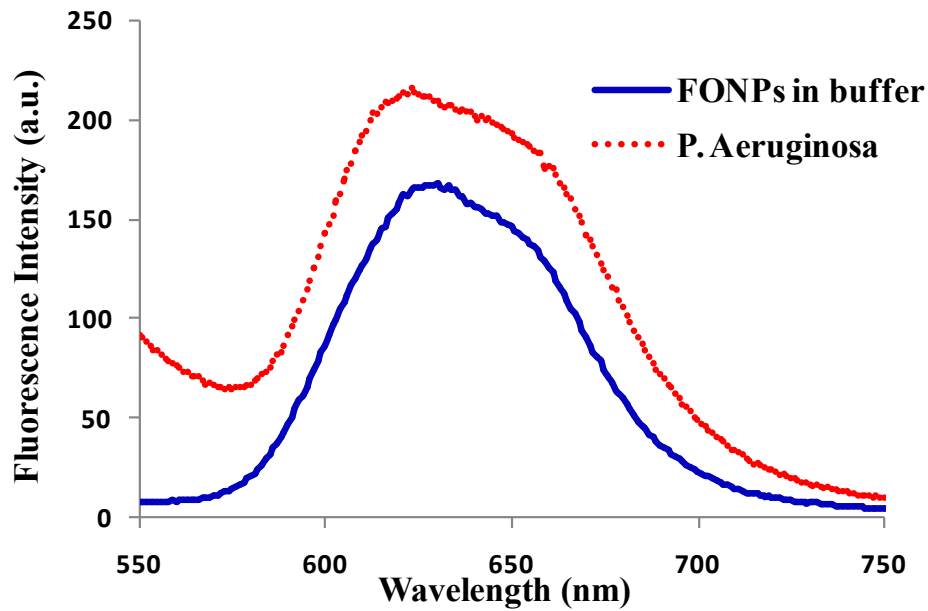

Figure S5. Effect of using buffer on the recognition properties of **FONPs**.

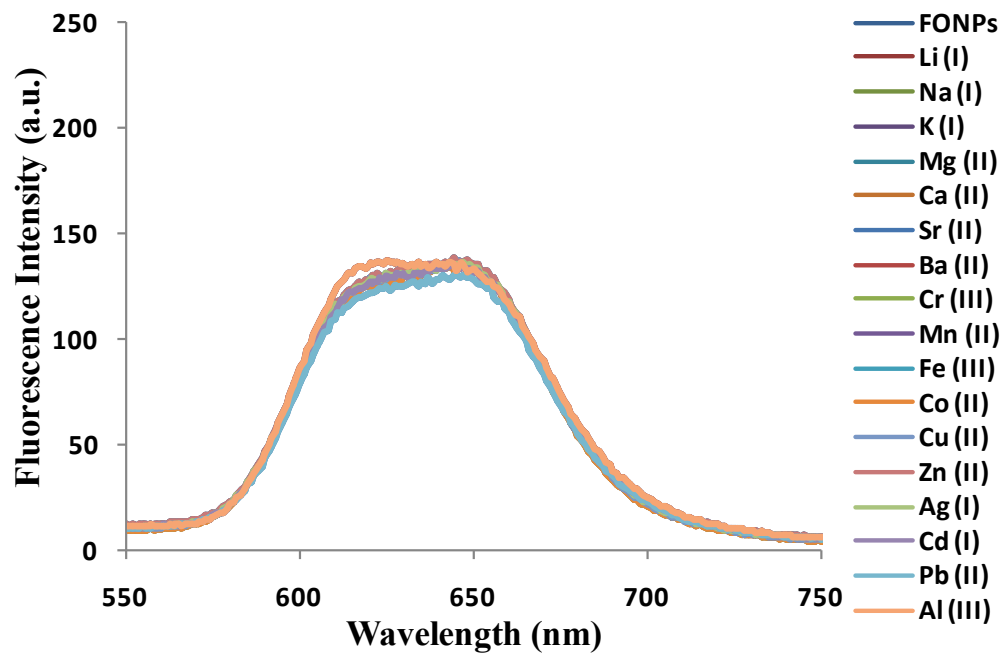

Figure S6. Fluorescence spectra of **FONPs** on addition of 5 $\mu$ M of various metal ions.

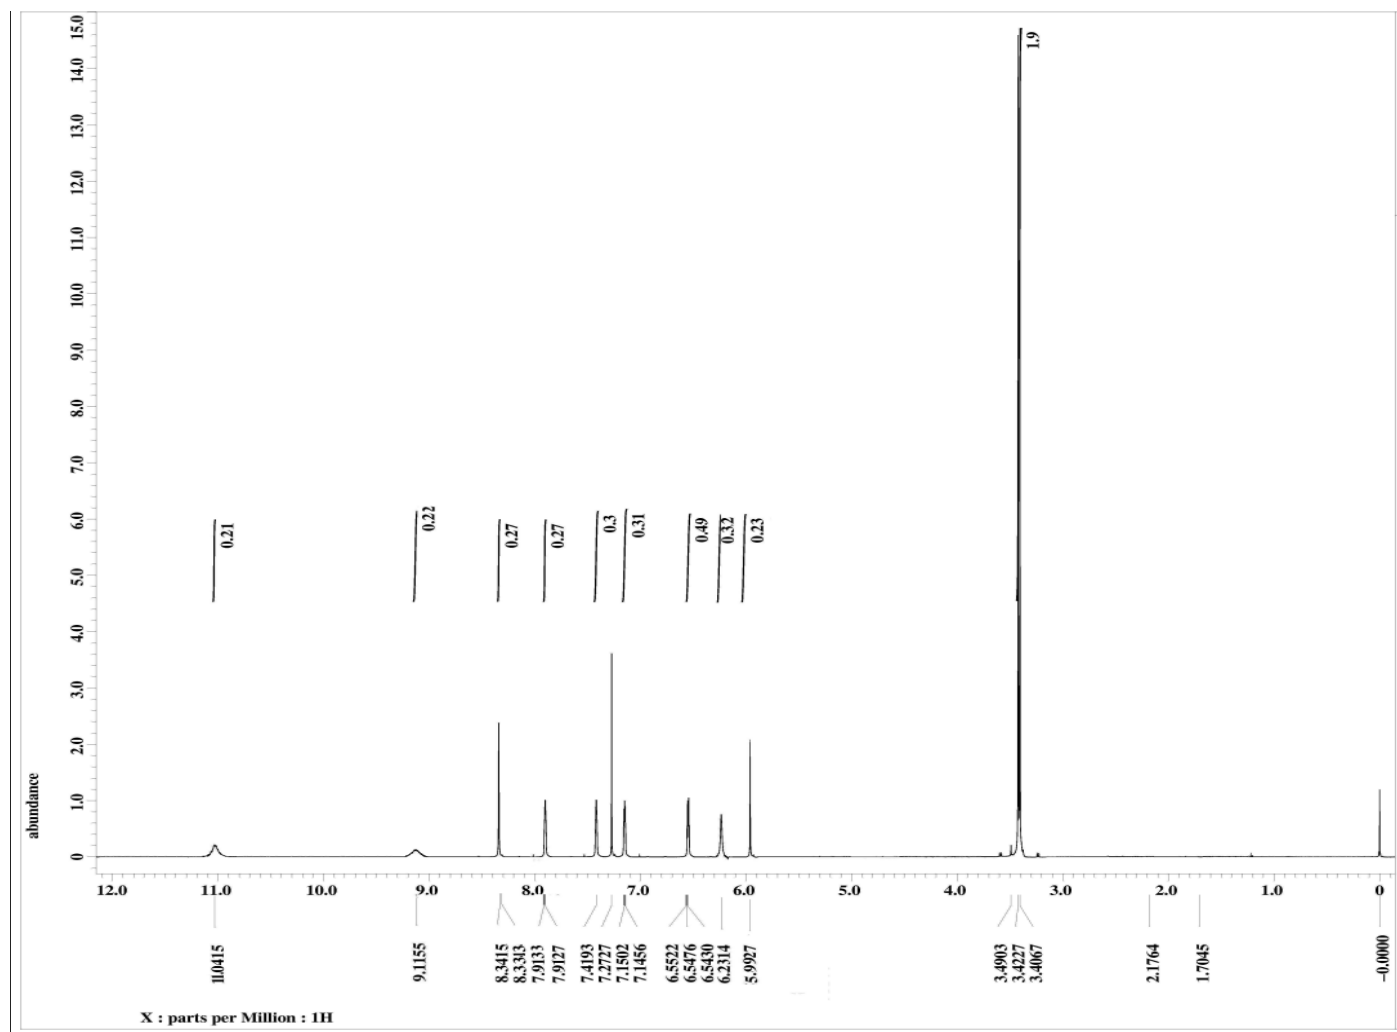

Figure S7. <sup>1</sup>H NMR of compound 1

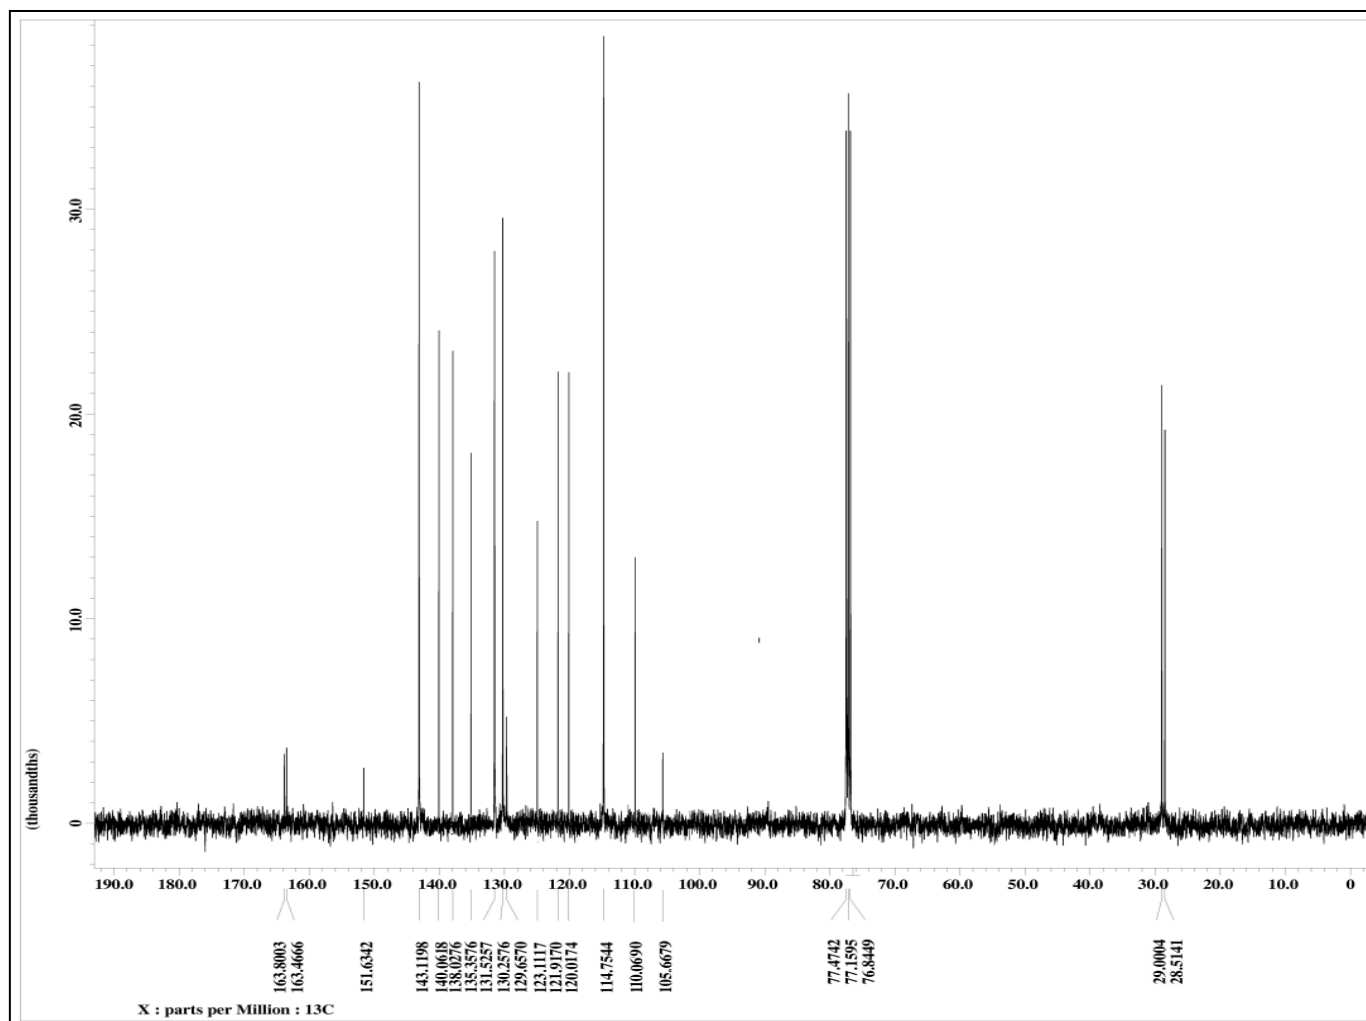

Figure S8.  $^{13}\text{C}$  NMR of compound 1

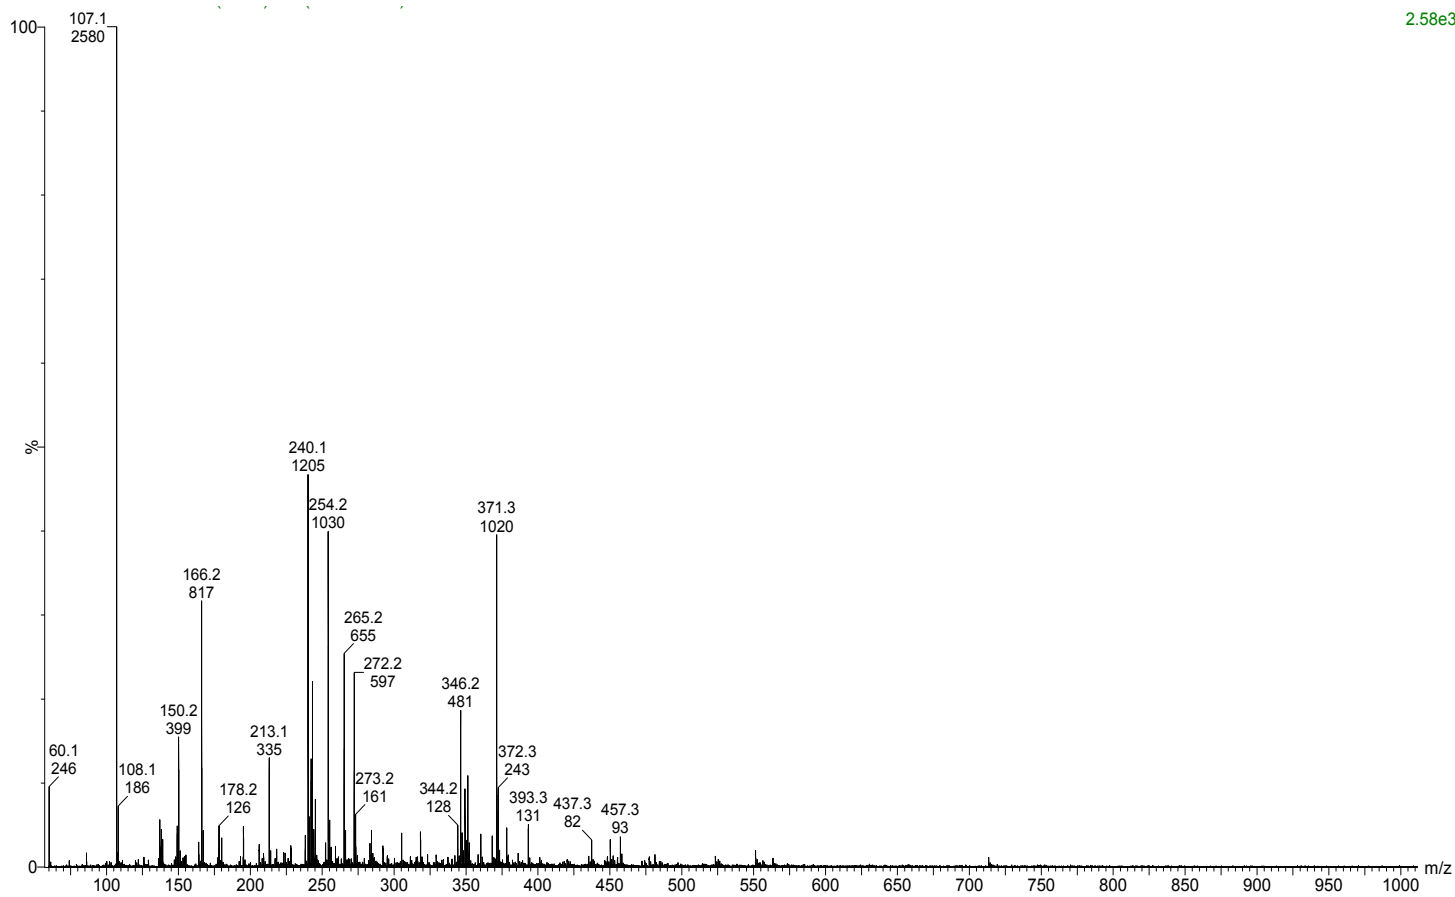

Figure S9. Mass spectra of Compound 1
